Table S1. Number of fish used for different parts of the study

| Technique                    | Mayer Lake | Drizzle Lake | Mayer Pond | Drizzle Pond | Doogan's Lake | Broughton Archipelago | Swan Lake |
|------------------------------|------------|--------------|------------|--------------|---------------|-----------------------|-----------|
| MSP                          | 5          | 5            | 5          | 3            | 4             | 5                     | 4         |
| <i>In situ</i> hybridization | 8          | 5            | 7          | 4            | 3             | 4                     | 7         |
| Histology                    | 3          | 3            | 4          | 4            | 3             | 3                     | 4         |
| Opsin sequencing             | 5          | 4            | 5          | 4            | 0             | 4                     | 5         |
| MSP, microspectrophotometry. |            |              |            |              |               |                       |           |
